# Supplementary material for: Predatory Functional Morphology in Raptors: Interdigital Variation in Talon Size Is Related to Prey Restraint and Immobilisation Technique
Source: PLoS One. 2009 Nov 25;4(11):e7999. doi: 10.1371/journal.pone.0007999 (PMC2776979; doi:10.1371/journal.pone.0007999)
Supplement: Table S2 — List of behaviour videos, categorised observations and general summaries of important behaviours observed. (0.06 MB XLS) [file pone.0007999.s002.xls]

## Sheet: Sheet1
	Supporting Information S2: Videos of predatory behaviour				Prey taken live	Strikes to head (1) body (2)	Flapping for stability	Bodyweight pins prey	Mantling	Plucking feather / fur	Good view of foot use	Tugging at flesh
	Video name	Time	Predator	Prey									Brief description of content
Accipitridae	Collared sparrowhawk carries food	0m33s	Accipiter cirrocephalus	?									hawk perches on branch with food in foot, flies away carrying food
	Coopers hawk stands on pigeon	0m43s	Accipiter cooperii	pigeon	1								stands on pigeon, panting, brief stuggle, moves feet for steadying
	Coopers hawk eats bird in tree	2m15s	Accipiter cooperii	small bird								1	eats bird on branch of tree, cleans beak afterwards
	Coopers hawk vs flicker	2m33s	Accipiter cooperii	flicker	1		1	1	1	1			struggling bird, predator moves prey around to find better footing, flicker escapes at the end of video
	Coopers hawk eating bird on log	0m44s	Accipiter cooperii	small bird						1			simple plucking video
	Coopers hawk kills black bird	9m27s	Accipiter cooperii	bird	1	1		1					head attacks, not much plucking, only at end
	Hawk catches pigeon	3m34s	Accipiter cooperii	dove	1			1	1	1			dove stays still, much plucking, panting raptor
	Coopers hawk eats small bird	1m24s	Accipiter cooperii	small bird							1	1	good view of d-II used to hold down dead bird
	Coopers hawk sits on fence, eats bird	1m39s	Accipiter cooperii	small bird			1			1	1		hawk sits on fence, plucks bird
	Coopers Hawk eating dove in car park	0m42s	Accipiter cooperii	pigeon				1			1	1	uses d2 to prise open body cavity, good claw closeup
	Coopers hawk eats bird on fence	9m10	Accipiter cooperii	bird			1			1	1	1	stands on fence, eats bird
	Coopers hawk killing pigeon on branch	2m0s	Accipiter cooperii	pigeon	1	2	1	1			1		excellent: hawk perching on branch, holds pigeon wing in foot, brief attacks from beak, mostly sitting on prey waiting for something
	Coopers hawk eating bluejay	1m23s	Accipiter cooperii	bluejay						1	1	1	hawk stood on top of bluejay, plucking and tearing strips of flesh
	Goshawk eats squirrel	1m38s	Accipiter gentilis	squirrel					1		1	1	good view of D-II used for pinning carcass for feeding
	Goshawk kills & plucks crow	7m10s	Accipiter gentilis	Corvus sp.	1	2	1	1	1	1	1		long video of struggling crow, lots of behaviour, panting raptor
	Goshawk catches rabbit	1m18s	Accipiter gentilis	rabbit	1		1		1				pursuit & capture, rabbit harried, good maneuvering
	Goshawk catches duck in air	0m27s	Accipiter gentilis	duck	1		1		1				pursuit & capture video, duck taken to ground for kill
	Goshawk catches rabbits	1m32s	Accipiter gentilis	rabbit	1								pursuit & capture, rabbit harried, good maneuvering
	Goshawk uses d2 while eating crow	0m06s	Accipiter gentilis	Corvus sp.							1	1	Good view of D-II used to prise open body of crow
	Goshawk catches duck, good weight use	1m16s	Accipiter gentilis	duck	1			1	1	1	1		falconry, good view of hawk atop duck at end of video, plucks base of neck
	Goshawk eats small bird, JAP	0m35s	Accipiter gentilis	bird						1	1	1	hawk holds small bird down, eats flesh
	Goshawk, juve, vs pigeon on sidewalk	1m44s	Accipiter gentilis	pigeon	1	1,2	1	1	1	1		1	barely alive pigeon flaps a little near end, feeding while prey alive
	Goshawk eats starling	0m32s	Accipiter gentilis	starling							1	1	good view of D-II used in feeding
	Goshawk clutches rabbit, falconry	1m15s	Accipiter gentilis	rabbit	1		1		1	1	1		good view of foot placement on head and torso, no real head attacks, probably constricted
	Goshawk eats bird, defends carcass	0m27s	Accipiter gentilis	bird					1	1	1	1	defends twice against other bird(s) flying close, not continuous run through incident, tugs at flesh, foot use, plucking
	Goshawk chases snow hare	1m18s	Accipiter gentilis	hare							1		goshawk chases snow hare, good harrying, unsuccessful hunt
	Goshawk eats rabbit, mantling	0m14s	Accipiter gentilis	rabbit					1		1	1	falconry, goshawk stands on rabbit, tugs at flesh, mantling
	goshawk eats rabbit up close	1m41s	Accipiter gentilis	rabbit					1	1	1	1	falconry, goshawk stands on rabbit, tugs at flesh, mantling, good view of feet position on head and torso
	Goshawk eats view from behind	0m25s	Accipiter gentilis	?							1	1	hawk tugs at flesh
	Sparrowhawk eats pigeon, Leeds, UK	0m20s	Accipiter nisus	pigeon	1	1	1	1		1			hawk stands on pigeon, plucks, pigeon probably still alive, some flicks of its head when neck is plucked
	Sparrowhawk eats pigeon next to flats	0m54s	Accipiter nisus	pigeon				1		1		1	hawk tugs at pigeon flesh
	Sparrowhawk mantles bird	0m29s	Accipiter nisus	bird	1	1,2	1	1	1				strong mantling, struggling prey, some dragging and brief attacks
	Sparrowhawk eats remains small bird	0m14s	Accipiter nisus	bird							1	1	good view of d2 used to hold down bird remains
	Sparrowhawk eats collared dove	0m32s	Accipiter nisus	collared dove				1		1	1	1	male eats collared dove, tugging, pinning with weight
	Sparrowhawk eats wood pigeon	1m00s	Accipiter nisus	wood pigeon							1	1	good view of d2 used to hold down bird remains
	Sparrowhawk eats bird, magpies take look	3m29s	Accipiter nisus	bird						1	1	1	hawk stands on bird, tugs flesh, 2 magpies stay near watching
	Sparrowhawk eating Blackbird	6m12s	Accipiter nisus	blackbird			1	1			1	1	hawk stands on blackbird, prob dead already, tugs at flesh
	Sparrowhawk stands on crow, Dublin	2m16s	Accipiter nisus	crow	1	1,2	1	1	1				hawk stands on crow, mantling heavy, crow struggles and flaps, cawing, hawk makes a few attempts to peck body & head, but flapping of crow gets in way
	Sparrowhawk kills blackbird	1m42s	Accipiter nisus	blackbird	1			1	1	1	1		hawk stands atop prey, plucks feathers, prey struggles
	Sparrowhawk, UK eats small bird	4m39s	Accipiter nisus	small bird						1	1	1	starling/blackbird size prey, good foot use
	UK sparrowhawk immob pigeon, edinburgh	3m46s	Accipiter nisus	pigeon	1			1	1	1			pigeon gets away at end, raptor comes back and gets it once, human scares raptor
	UK sparrowhawk plucks, beheads pigeon	7m31s	Accipiter nisus	pigeon	1	1	1	1		1			lots of plucking, detailed view of carcass after raptor flies off. Nothing eaten, must have been scared away
	UK sparrowhawk eats pigeon	1m05s	Accipiter nisus	pigeon				1		1		1	typical feeding video
	UK sparrowhawk extended pigeon kill	7m14s	Accipiter nisus	pigeon	1		1	1	1	1	1	1	drags pigeon about, probably to avoid cameraman, into stream, then plucks & eats pigeon on streambank while clearly still alive
	UK sparrowhawk kills collared dove	1m58s	Accipiter nisus	dove	1		1	1		1		1	drags dove about, much struggling at start, plucks then eats
	Sharpshinned hawk klls bluejay	1m07s	Accipiter striatus	bluejay	1	2	1	1	1	1			lots of mantling of struggling bluejay, plucking extensive
	Sharpshinned vs morning dove	1m45s	Accipiter striatus	morning dove								1	hawk eats dead dove in driveway
	Sharpshinned vs morning dove2	2m37s	Accipiter striatus	morning dove						1	1	1	flies off with prey at end
	Sharpshinned vs morning dove3	1m13s	Accipiter striatus	morning dove	1					1			plucking while still alive, flies off at end
	Sharpshinned eats blur	1m07s	Accipiter striatus									1	okay foot view, blurry video with shake
	Sharp shinned hawk plucking feathers in tree	0m32s	Accipiter striatus	bird						1	1		hawk perched in tree, plucking feathers from bird
	Accipiter with trapped sparrow	0m24s	Accipiter sp.	sparrow	1					1	1		hawk pins down sparrow with D2, plucks, sparrow alive according to text that accompanies video
	Accipiter eats pigeon	1m27s	Accipiter sp.	pigeon			1			1	1	1	tugging at flesh
	Accipiter sp plucks sparrow	0m37s	Accipiter sp.	sparrow						1	1		prob coopers hawk plucks sparrow, good d2 use pinning
	Accipiter vs live pigeon on sidewalk	0m25s	Accipiter sp.	pigeon	1	2	1	1	1				coopers / sharp shinned hawk, struggles with live pigeon on sidewalk
	Accipiter vs bird in tree.flv	1m00s	Accipiter sp.	small bird	1		1						small bird held in right foot, no head attacks, probably just constriction
	Accipiter stands on pigeon	1m01s	Accipiter sp.	pigeon	1				1	1			lots of mantling, not much else to see
	Accipiter keeps hold of pigeon	0m16s	Accipiter sp.	pigeon	1		1	1					lots of struggling, hawk keeps hold after some flapping by pigeon
	Accipiter & medium bird	0m49s	Accipiter sp.	bird	1		1	1		1			stands on live prey, plucks feathers, flies away with prey at end
	Accipitrine eat pigeon, fans tail	1m27s	Accipiter sp.	pigeon							1	1	probably cooper's hawk, stands on top of presumably dead pigeon, tugs at flesh, fans tail for balance
	Sparrowhawk kills eats pigeon, nice mantling	4m29s	Accipiter sp.	pigeon				1	1	1	1		hawk on pigeon, drags prey short distance away from cameraman
	Accipitrid catches bluejay, struggling	2m00s	Accipitridae sp.	bluejay	1		1		1				Bluejay caught, struggling on ground, raptor drags it about, flies away holding onto prey, bluejay escapes due to human intervention
	Pale chanting goshawk-feeding on ground	0m23s	Melierax canorus	?								1	holds food under feet, tugs with beak
	Gabar goshawk & struggling bird	0m44s	Micronisus gabar	bird	1						1		has small bird ?woodpecker? Impaled on claw, by the beak, bird struggles and eventually falls off
	Black kite tugs at food under feet	0m59s	Milvus migrans	?							1	1	holds prey (small mammal?) under inside of feet, tugs at flesh
	Little eagle with large bird	1m02s	Aquila (Hieraaetus) morphnoides	large bird	1			1			1		eagle stands on branch, large bird held under one foot, other used to grip the branch, bird seems still alive
	Golden eagle catches, kills snow hare	3m09s	Aquila chrysaetos	Hare	1		1		1	1	1		no obvious head or body attacks, although footage short of immobilisation, probably constricted, lots of kicking by hare
	Golden eagle eats whitetail carrion in river	1m01s	Aquila chrysaetos	deer								1	eagle eats dead deer caught in river, stands on deer, tugs flesh
	Golden eagle catches kills large hare	0m59s	Aquila chrysaetos	Hare	1		1					1	eagle grapples with very large hare on ground, vigorous struggling, edit cut to eating hare closeup
	Imperial eagle & roadkill	0m14s	Aquila heliaca	deer							1	1	eagle eating roadkill innards, picks up flesh in foot, flies away
	Steppe eagle eats roadkill1	0m53s	Aquila nipalensis	deer							1	1	eagle stands on dead deer, tugs at flesh, scared by traffic
	Steppe eagle eats roadkill2	0m44s	Aquila nipalensis	deer							1	1	continued from above, more tugging at flesh
	Tawny eagle eats1	0m52s	Aquila rapax	large mammal							1	1	eagle tugs at flesh, some visibility of feet
	Tawny eagle eats2	0m33s	Aquila rapax	large mammal							1	1	continued from above
	Pacific baza eats stick insect	0m33s	Aviceda subcristata	stick insect									hawk sits on branch, holds insect in one foot, pulls off leg with beak
	Crested serpent eagle eats snake1	0m40s	Spilornis cheela	snake							1	1	eagle perched on branch, snake underfoot, tugs at snake flesh
	Crested serpent eagle eats snake2	0m38s	Spilornis cheela	snake							1	1	as preceding video
	Bald Eagle catches bird	0m53s	Haliaeetus leucocephalus	bird	1		1	1					drags prey around a short distance, held in one foot
	Bald Eagle eats crab	4m58s	Haliaeetus leucocephalus	crab	1	2					1	1	eagle places feet cautiously, few attempts to get crab where it cannot retaliate
	Bald eagle -captive- eats rat	1m35s	Haliaeetus leucocephalus	rat							1	1	holds rat with D-II, tears strips of flesh
	Bald eagle eats canada goose	2m03s	Haliaeetus leucocephalus	canada goose				1			1	1	stands atop goose, pulls out flesh
	Bald eagle eats flesh	2m23s	Haliaeetus leucocephalus	?							1	1	stands on pile of flesh, tugs with beak, crows join in
	Bald eagle eats deer carcass	1m31s	Haliaeetus leucocephalus	deer							1	1	passively chases away crows, tugs at flesh, uses inside of feet to hold down flesh, 2nd bald eage arrives and similarly feeds
	Harpy eagle eats rat, captive	0m22s	Harpia harpyja	rat							1	1	eagle holds rat in D-II, tugs at flesh, zoo captive
	Harpy eagle eats bird, captive	0m19s	Harpia harpyja	bird							1	1	eagle holds bird in one foot, perches with other, D-II embedded deep in prey
	Black collared hawk eats snake1	0m33s	Busarellus nigricollis	reptile		?							hawk caught something, presumably dead by time video shot, moves kill into grass, possible strikes at body
	Black collared hawk eats snake2	0m39s	Busarellus nigricollis	reptile		?						1	hold prey under feet, hawk jabs at prey with beak ?killing it? Does not appear to eat anything after strikes
	Black collared hawk eats snake3	0m46s	Busarellus nigricollis	reptile							1	1	see that prey is a snake or lizard tail, holds prey under feet and pulls at other end to rip off flesh
	Black collared hawk eats snake4	0m48s	Busarellus nigricollis	reptile							1	1	hawk finishes by swallowing the remaining tail/end of snake
	Red Tail & Sharp shinned hawk	6m28s	B. jamaicensis & A. striatus	squirrel & ?				1		1	1	1	red tail stands on squirrel, dismembers it; sharpshinned stands on prey on branch, tugs at flesh
	Red tailed hawk eats roadkill	5m45s	Buteo jamaicensis	?								1	hawk eats roadkill
	Hawk killed squirrel	1m18s	Buteo jamaicensis	squirrel				1	1				hawk sits atop squirrel, no visible action (possibly constricting), flies away with prey
	Red tail catches, kills squirrel	0m54s	Buteo jamaicensis	squirrel	1	1			1		1		hawk swoops on squirrel, prey struggles, some head strikes, mostly held in feet, mantling
	Red-Tailed hawk catches a red squirrel and eats it	3m17s	Buteo jamaicensis	squirrel						1		1	stands on rock with dead squirrel, plucks fur, tugs off flesh
	RTH&Sq kill	1m54s	Buteo jamaicensis	squirrel	1	1,2	1	1	1				takes live sq, by end video sq is dead, lots of behaviour
	RTH eats rabbit, live foetuses pt1	1m39s	Buteo jamaicensis	rabbit							1	1	hawk dismembers mother rabbit, foetal rabbits discarded, seen moving in grass
	RTH eats rabbit, live foetuses pt2	1m20s	Buteo jamaicensis	rabbit							1	1	continued from above, good view of dismemberment, more squirming rabbit foetuses
	Red Tail eats rabbit in garden	0m21s	Buteo jamaicensis	rabbit							1	1	short video, hawk tugs at rabbit flesh
	Red tail rabbit drop	0m28s	Buteo jamaicensis	rabbit	1								good drop onto rabbit from perch
	Red tail eats squirrel by chain fence	0m27s	Buteo jamaicensis	squirrel								1	simple eating video
	Red tail on rabbit	4m45s	Buteo jamaicensis	rabbit	1			1				1	seems to be constricted, no visible head attacks until stops moving
	Red tailed hawk albino eating	0m34s	Buteo jamaicensis	?							1	1	bird on perch in captivity, pins flesh with D-II, tugs at flesh
	Red tailed hawk eats pigeon by road	7m48s	Buteo jamaicensis	pigeon						1	1	1	red tail sits by road and eats pigeon
	Red tailed hawk eat duck	3m11s	Buteo jamaicensis	duck			1	1	1	1	1	1	tail mantling, excellent closeup of beak tugging at flesh
	Red tailed hawk eats rabbit on pole	0m54s	Buteo jamaicensis	rabbit			1			1	1	1	red tail stands atop pole on top of rabbit, plucks fur, tugs at flesh
	Red tailed hawk juve eats squirrel	0m33s	Buteo jamaicensis	squirrel				1			1	1	young red tail stands atop squirrel, dismemberment
	Redtail eats squirrel	1m15s	Buteo jamaicensis	squirrel				1			1	1	red tail stands on squirrel, tugs at flesh
	Redtail & squirrel, eating off fence	0m22s	Buteo jamaicensis	squirrel								1	redtail perched on fence, tugs at sqirrel
	Juv red tail eats squirrel	1m00s	Buteo jamaicensis (juve)	squirrel									juve hawk, squirrel already partly dismembered, hawk uses foot to hold down meat while beak feeds
	Roadside hawk catches fish1	0m45s	Buteo magnirostris	fish									hawk hops for rock to rock watching fish in water
	Roadside hawk catches fish2	0m34s	Buteo magnirostris	fish	1						1		hawk catches fish, good view of foot holding it on rock, flies away
	Roadside hawk mantles flesh	0m30s	Buteo magnirostris	?					1		1		captive hawk stands on flesh, mantles, squawks at traffic
	Puna hawk pins food with both d2	0m32s	Buteo poecilochrous	?							1	1	captive hawk pins small flesh lump with D-II only, excellent view
	Great black hawk eats on rock1	0m51s	Buteogallus urubitinga	?			1				1	1	Hawk stands on flesh on top of rock, tugs at meat, flaps for stability
	Great black hawk eats on rock2	0m49s	Buteogallus urubitinga	?			1				1	1	continuation of above
	Great black hawk eats in bush	0m51s	Buteogallus urubitinga	?			1					1	stands on prey obscured by thicket, flaps for stability, tugging flesh
	Black chested buzzard eagle on road1	0m44s	Geranoaetus melanoleucus	?							1	1	buzzard stands on roadkill, tugs at flesh
	Black chested buzzard eagle on road2	0m29s	Geranoaetus melanoleucus	?							1	1	continuation, as above, flies to top of roadcut when scared by traffic
	Plumbeous kite eats on branch	0m46s	Ictinia plumbea	?							1		Kite perched on branch, small food in one foot, lift foot to beak, or lowers beak to foot to feed
	Gray headed kite holds food in feet	0m31s	Leptodon cayanensis	?							1	1	captive kite holds meat under D-II s, tugs at food
	Hen harrier eats on ground	0m32s	Circus cyaneus	bird								1	harrier tugs at dead bird on ground
	Pallid harrier eats on ground	0m31s	Circus macrourus	?								1	harrier seen at distance foot on prey, tugging flesh in beak
	Lappet faced vulture eats carrion	1m00s	Torgos tracheliotus	large mammal							1	1	3 vultures crowd dead antelope, one uses foot to steady food
	White headed vulture uses both feet1	0m29s	Trigonoceps occipitalis	carrion							1	1	vulture uses both feet to stabilise carrion as it tugs away flesh
	White headed vulture uses both feet2	0m24s	Trigonoceps occipitalis	carrion							1	1	as above, continuation
	Hooded vulture eats roadkill	0m15s	Necrosyrtes monachus	?								1	vulture hops into road, takes a couple mouthfulls and flees
	White backed vulture in grass	0m26s	Gyps africanus	large mammal							1	1	vulture places foot on carcass and tugs at flesh with head
	White backed vulture & roadkill1	0m27s	Gyps africanus	large mammal								1	vulture tugs at flesh of roadkill ?antelope?
	White backed vulture & roadkill2	0m34s	Gyps africanus	large mammal								1	continuation, as above
	Griffons eat deer	0m47s	Gyps fulvus	large mammal							1	1	3-6 vultures tug carrion from deer, one uses foot to steady carcass
Falconidae	Lanner falcon eating, food under d2s	0m55s	Falco biarmicus	?							1	1	dark video (in nesting box?) but can see D-II used to pin food
	Merlin eats small bird	7m15s	Falco columbarius	small bird						1	1	1	merlin on post plucking and eating small bird
	Merlin eats bird on tv aerial	2m05s	Falco columbarius	small bird						1		1	typical eating video, merlin cleans beak at end
	Peregrine plucks bird in grass	0m26s	Falco peregrinus	wood pigeon						1			peregrine plucks wood pigeon in grass
	Peregrine eating on window, prey under feet	0m32s	Falco peregrinus	bird							1	1	peregrine on windowsill, tugs at flesh of bird
	Peregrine on windowsill	0m20s	Falco peregrinus	?							1	1	peregrine eats on windowsill
	Peregrine vs seagull photostory	n/a	Falco peregrinus	seagull	1			1	1	1	1		Peregrine caught seagull, stands on top of it, plucks neck, scared away by other hawk, seagull neck completely plucked
	Bat falcon eats in tree	0m42s	Falco rufigularis	?									falcon returns to treetop to eat food
	Gyr falcon eating on post	1m00s	Falco rusticolus	bird								1	falcon standing on post, tugging flesh from dead bird
	Falcon eats prey in garden	5m59s	Falco sp.	small bird					1			1	not very good video, young kestrel or merlin, small prey
	Falco plucking pigeon	0m48s	Falco sp.	pigeon				1		1			probable peregrine plucks pigeon
	Falcon holds small bird in garden	1m46s	Falco sp.	small bird									falcon hops about with bird in foot
	Kestrel eats bat on windowledge	4m28s	Falco sp.	bat			1				1	1	kestrel eats bat on windowledge, long video, wings held out slightly: maybe minor mantling, bat was in desc of video, see wing about 150s
	Am kestrel eats starling	1m32s	Falco sparverius	starling				1			1	1	falcon frantically tugs at neck flesh (end of neck breaking attempt?), starling seems dead, then kestrel switches to plucking, drags away prey
	American kestrel & large bird	0m16s	Falco sparverius	large bird									falcon has possible crow as prey, seems dead, larger than kestrel
	American Kestrel eats bird1	0m31s	Falco sparverius	large bird							1	1	Kestrel caught large bird, starling sized, prey is dead, kestrel feeding
	American Kestrel eats bird2	0m36s	Falco sparverius	large bird							1	1	as above, continuation
	American Kestrel eats bird3	0m33s	Falco sparverius	large bird							1	1	as above, continuation
	American Kestrel eats insect	0m35s	Falco sparverius	insect							1	1	kestrel caught large green insect, 1 wing discarded, eats insect
	Kestrel american, eats mouse	2m32s	Falco sparverius	mouse			1				1	1	kestrel eats mouse, swallows most of it in one go, slight flapping
	Common Kestrel & mouse in trap	0m37s	Falco tinnunculus	mouse			1				1	1	kestrel raids mouse trap for victim, flaps about trying to get mouse from trap, pulls mouse head off and tries to eat it, flies away
	Southern crested caracara eats carrion	0m41s	Polyborus plancus	?							1	1	caracara uses foot to hold down food, looks like a flat dried out small lizard or bird carcass, other caracara runs in to steal food
	Southern crested caracara & carrion & crab	0m42s	Polyborus plancus	?							1	1	caracara feeds by side of road then flies to harass a crab crossing the road
	Southern Crested Caracara eat carcass1	0m50s	Polyborus plancus	large mammal							1	1	Caracara scavenges from skinned large mammal, tugging flesh from belly region
	Southern Crested Caracara eat carcass2	0m48s	Polyborus plancus	large mammal							1	1	as above, continuation, some slight tail & wing movement for balance
Strigiformes	Barn owl hunts, catches rodent	4m46	Tyto alba	rodent	1	?			1			1	owl flies around field looking for prey, sits on post, swoops into grass, mantles, makes beak strike at feet, waits 40secs, flies to post with rodent, tugs at rodent with beak while held in foot, swallows whole
	Barn owl swallows mouse, captive	0m16s	Tyto alba	mouse									captive owl swallows mouse whole
	Barred owl kills vole	0m41s	Strix varia	vole	1	1							owl lands on vole, grips in foot, strikes at neck with beak, vole visibly struggling, holds prey in beak (breaks neck?), swallows prey
	Barred owl eats snake	0m45s	Strix varia	snake	1	1					1	1	has snake in tree, strikes at head, tugs flesh, swallows mostly whole
	Great horned owl catches eats vole	1m08s	Bubo virginianus	vole	1	?							owl swoops from tree, cut to prey, owl grips prey in foot while head bites, quickly swallows prey whole
	Screech owl captive eats mouse	3m36s	Megascops kennicottii	mouse							1		owl holds dead mouse, seems too big (given by human to injured owl)
	Ferruginous Pygmy Owl eats lizard1	0m11s	Glaucidium brasilianum	lizard	1						1		owl sits on branch, flies off, returns with lizard in mouth
	Ferruginous Pygmy Owl eats lizard2	0m33s	Glaucidium brasilianum	lizard							1		continuation from above, owl sits on branch lizard in one foot, swallows lizard whole
Cariamidae	Seriema slams ball	0m36s	Cariama cristata	ball									seriema picks up rubber ball on beak, slams into ground (captive zoo show)
	Seriema eats snake	0m26s	Cariama cristata	snake									Seriema picks up snake in beak, no slamming or eating, video ends
	Seriema slams snake1	0m15s	Cariama cristata	snake							1		Seriema picks up rubber snake, slams into ground (captive zoo show)
	Seriema slams snake2	0m21s	Cariama cristata	snake							1		Seriema picks up rubber snake, slams into ground (captive zoo show)
Pandionidae	Osprey eats fish on balcony	1m25s	Pandion haliaetus	fish							1	1	Osprey eating fish, post capture, feet clearly visible
	Osprey eats fish in tree	0m28s	Pandion haliaetus	fish		1					1	1	osprey pulls at fish head, holds fish with left foot, perched in tree
Sagittariidae	Secretary bird attacks rubber snake	0m25s	Sagittarius serpentarius	snake		1,2					1		limited stomp attacks, seems to want to hold on to rubber snakes head head with its feet (zoo captive)
	Secretary bird attacks rubber snake2	0m37s	Sagittarius serpentarius	snake		1					1		bird attacks rubber snake with feet, always aims for head, some beak attacks also made to head (zoo captive)
	Secretary bird stabs food in hand	0m18s	Sagittarius serpentarius	?							1		bird stabs with feet at handler's hand/open palm that has food in it
	Secretary bird in zoo attacks for show	1m00s	Sagittarius serpentarius	snake		1,2	1				1		bird stabs at rubber snake with feet, glides, opens wings for stability (zoo captive in show)
	Secretary bird stomps on wild snake	0m33s	Sagittarius serpentarius	snake	1	?					1		bird strikes small snake with foot, swallows it whole
