# Supplementary material for: Predatory Functional Morphology in Raptors: Interdigital Variation in Talon Size Is Related to Prey Restraint and Immobilisation Technique
Source: PLoS One. 2009 Nov 25;4(11):e7999. doi: 10.1371/journal.pone.0007999 (PMC2776979; doi:10.1371/journal.pone.0007999)
Supplement: Table S3 — List of observed taxa, arranged phylogenetically. (0.03 MB XLS) [file pone.0007999.s003.xls]

## Sheet: Sheet1
Supporting Information S3: Raptor taxa observed (for morphology only) during analysis. All observed taxa followed expected family level trends.
Family	Subfamily	Tribe	Subtribe	Infratribe	Subclade	Genus species	Common name	Geographic distribution
					(Griffiths et al., 2007)			N. America	Europe	Asia	S. America	Africa	Australasia
Falconidae	Falconinae	Caracarini				Caracara cheriway	Northern Caracara	x			x
						Milvago chimango	Chimango Caracara				x
						Phalcoboenus australis	Striated Caracara				x
		Falconini				Falco berigora	Brown Falcon						x
						Falco cherrug	Saker Falcon		x	x		x
						Falco columbarius	Merlin	x	x	x
						Falco jugger	Laggar Falcon			x
						Falco mexicanus	Prairie Falcon	x
						Falco peregrinus	Peregrine Falcon	x	x	x	x	x	x
						Falco rusticolus	Gyrfalcon	x	x	x
						Falco sparverius	American Kestrel	x			x
						Falco tinnunculus	Common Kestrel		x	x		x
						Falco subbuteo	Eurasian Hobby		x	x		x
	Herpetotherinae					Micrastur ruficollis	Barred Forest-falcon	x			x
						Micrastur mirandollei	Slaty-backed Forest-falcon				x
						Herpetotheres cachinnans	Laughing falcon	x			x
Sagittaridae						Sagittarius serpentarius	Secretary bird					x
Pandionidae						Pandion haliaetus	Osprey	x	x	x	x	x	x
Accipitridae	Accipitrinae	Elanini				Elanus axillaris	Black-shouldered Kite						x
		Gypaetini	Gypaetina			Gypaetus barbatus	Lammergeier		x	x		x
			Pernina			Pernis apivorus	Honey Buzzard		x	x		x
		Accipitrini	Accipitrina	Harpiita		Harpia harpyja	Harpy Eagle	x			x
				Aquilita		Aquila audax	Wedge-tailed Eagle						x
						Aquila chrysaetos	Golden Eagle	x	x	x		x
						Aquila kienerii	Rufous-bellied Eagle			x
						Aquila pomarina	Lesser Spotted Eagle		x	x		x
						Aquila rapax	Tawny Eagle			x		x
						Polemaetus bellicosus	Martial Eagle					x
						Stephanoaetus coronatus	Crowned Eagle					x
				Accipitrita	Accipiter & Circus	Accipiter badius	Shikra			x		x
						Accipiter cooperii	Cooper's hawk	x
						Accipiter gentilis	Goshawk	x	x	x
						Accipiter nisus	Eurasian Sparrowhawk		x	x		x
						Accipiter striatus	Sharp-shinned Hawk	x			x
						Circus cyaneus	Hen Harrier	x	x	x
					Buteonines (1)	Buteo buteo	Common Buzzard		x	x		x
						Buteo hemilasius	Upland Buzzard			x
						Buteo jamaicensis	Red-tailed Hawk	x
						Buteo lagopus	Rough-legged Buzzard	x	x	x
						Buteo platypterus	Broad-winged Hawk	x			x
						Buteo regalis	Ferruginous Hawk	x
						Buteo swainsoni	Swainson's Hawk	x			x
						Parabuteo unicinctus	Harris Hawk	x			x
						Harpyhaliaetus coronatus	Crowned Solitary Eagle				x
					Sea Eagles & Milvus	Haliaeetus albicilla	White-tailed Sea-eagle		x	x
						Haliaeetus leucocephalus	Bald Eagle	x
						Milvus milvus	Red Kite		x			x
Strigiformes						Aegolius acadicus	Northern Saw-whet Owl	x
						Aegolius funereus	Tengmalm's Owl	x	x	x
						Asio flammeus	Short-eared Owl	x	x	x	x	x
						Asio otus	Long-eared Owl	x	x	x
						Athene cunicularia	Burrowing Owl	x			x
						Athene noctua	Little Owl		x	x		x
						Bubo bubo	Eurasian Eagle Owl		x	x
						Bubo scandiaca	Snowy Owl	x	x	x
						Bubo virginianus	Great Horned Owl	x			x
						Glaucidium brasilianum	Ferruginous Pygmy-owl	x			x
						Glaucidium gnoma	Northern Pygmy-owl	x
						Megascops asio	Eastern Screech Owl	x
						Strix nebulosa	Great Grey Owl	x	x	x
						Strix varia	Barred Owl	x
						Surnia ulula	Northern Hawk Owl	x	x	x
						Tyto alba	Common Barn Owl	x	x	x	x	x	x
